# Supplementary material
Source: PubMed Central journal article supplement (PMC10529373)
Supplement: NIHMS1918045-supplement-1.pdf [file NIHMS1918045-supplement-1.pdf]

## **Supplemental information**

**Improvement of sensory deficits in Fragile X mice by increasing cortical interneuron activity after the critical period.**

Nazim Kourdougli, Anand Suresh, Benjamin Liu, Pablo Juarez, Ashley Lin, David T. Chung, Anette Graven Sams, Michael Gandal<sup>3</sup>, Verónica Martínez-Cerdeño, Dean V. Buonomano, Benjamin J. Hall, Cédric Mombereau, and Carlos Portera-Cailliau\*.

**Supplementary figures: 13**

**Supplementary table: 1**

**Supplementary videos: 2**

**\*Lead Contact:** Carlos Portera-Cailliau

Percentage of PV-tdTom<sup>+</sup> cells that express GCaMP6S at P15

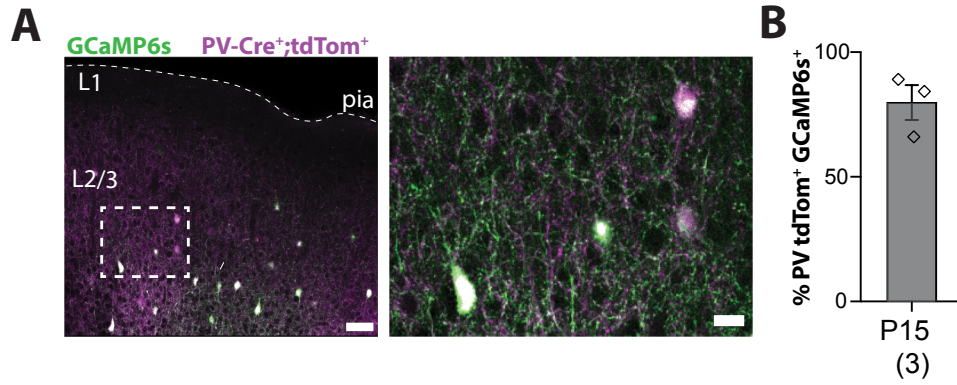

Percentage of Nkx2.1-tdTom<sup>+</sup> cells that express GCaMP6S at P6

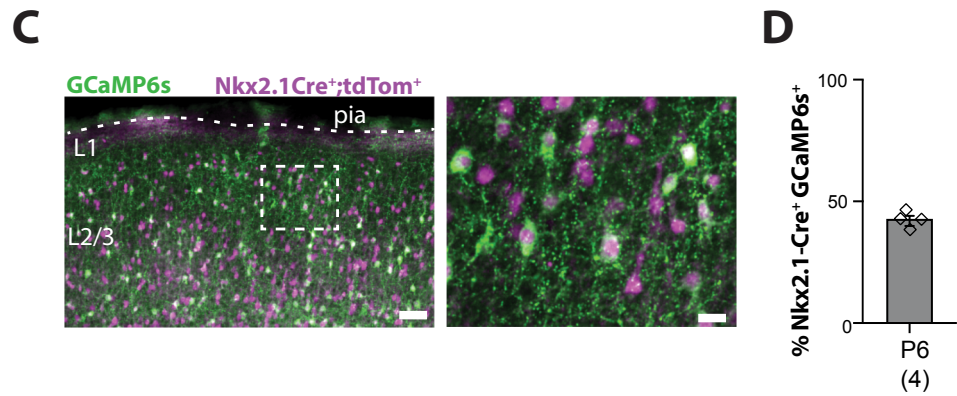

Percentage of Nkx2.1<sup>+</sup>-GCaMP6s<sup>+</sup> cells that express SST at P6

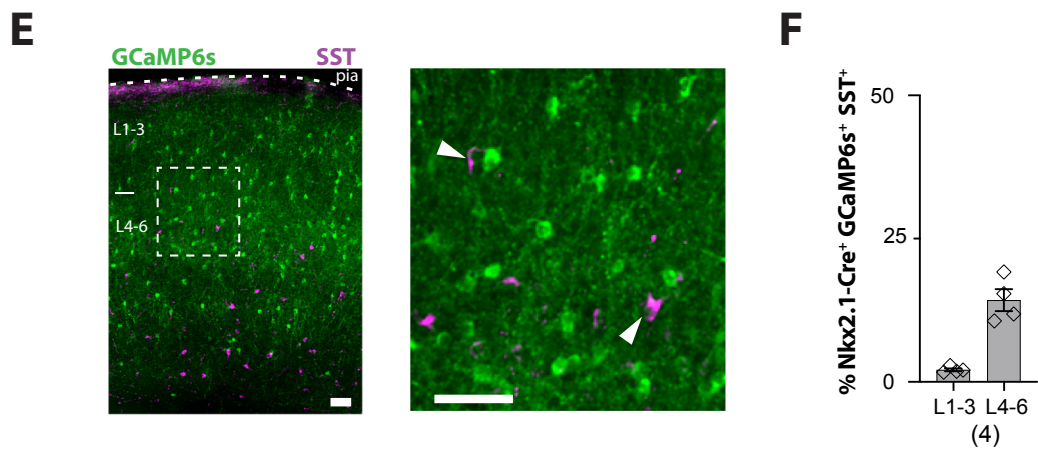

Percentage of Nkx2.1-tdTom<sup>+</sup> cells that express SST at P6

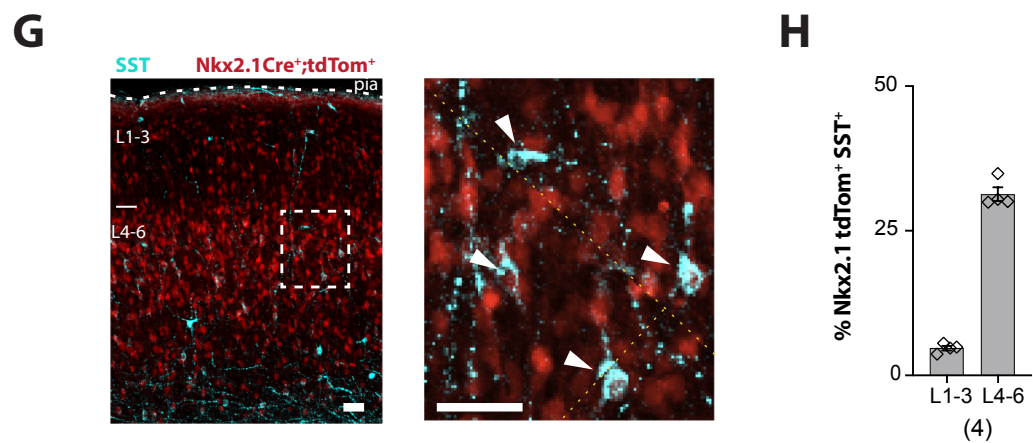

Supplementary Fig. S1

**Supplementary Fig. S1: Efficacy of viral strategy to express GCaMP6s in different IN populations in P15 mice.** (Related to Fig. 1)

- A. Example field of view of PV-Cre<sup>+</sup>-tdTom<sup>+</sup> (magenta) expressing GCaMP6s (green) in PV-Cre;Ai14<sup>+/-</sup>; *Fmr1* KO mice at P15.
- B. An injection of rAAV-CAG-DIO-GCaMP6s virus in S1 at P10 resulted in a high proportion of PV-INs also expressing GCaMP6s by P15 (79.8± 7%, n=3 mice). This pertains to Fig. 1A-F. Scale= 20 μm.
- C. Example field of view of Nkx2.1-Cre<sup>+</sup>-tdTom<sup>+</sup> (magenta) expressing GCaMP6s (green) in Nkx2.1-Cre;Ai14<sup>+/-</sup> *Fmr1* KO mice at P15.
- D. An injection of rAAV-CAG-DIO-GCaMP6s virus in S1 at P1 resulted in 43.4± 1.6% of Nkx2.1-INs also expressing GCaMP6s (n=4 mice). Note that the density of Nkx2.1-Cre<sup>+</sup>-GCaMP6s<sup>+</sup> cells is comparable to other reports<sup>1</sup>. This pertains to Fig. 1G-L. Scale= 20 μm.
- E. Representative image of Nkx2.1-INs expressing GCaMP6s (arrowheads, following injection of rAAV-CAG-DIO-GCaMP6s virus in S1 at P1) and immunostained for SST at P6. Scale= 50 μm.
- F. Percentage of Nkx2.1-Cre<sup>+</sup>;GCaMP6s<sup>+</sup> INs that co-express SST at P6 (2.1± 0.2% in L1-L3 and 14.2± 1.9% in L4-6).
- G. Representative image of Nkx2.1-Cre<sup>+</sup>;tdTom<sup>+</sup> INs immunostained for SST at P6. Arrowheads depicts the co-expressing cells. Yellow dotted line indicates uneven stitching by Zeiss Apotome. Scale= 50 μm.
- H. Percentage of Nkx2.1-Cre<sup>+</sup>;tdTom<sup>+</sup> INs that co-express SST at P6 (4.7± 0.3% in L1-L3 and 31.3± 1.2% in L4-6).

## SST-IN activity in P15 WT and *Fmr1* KO mice

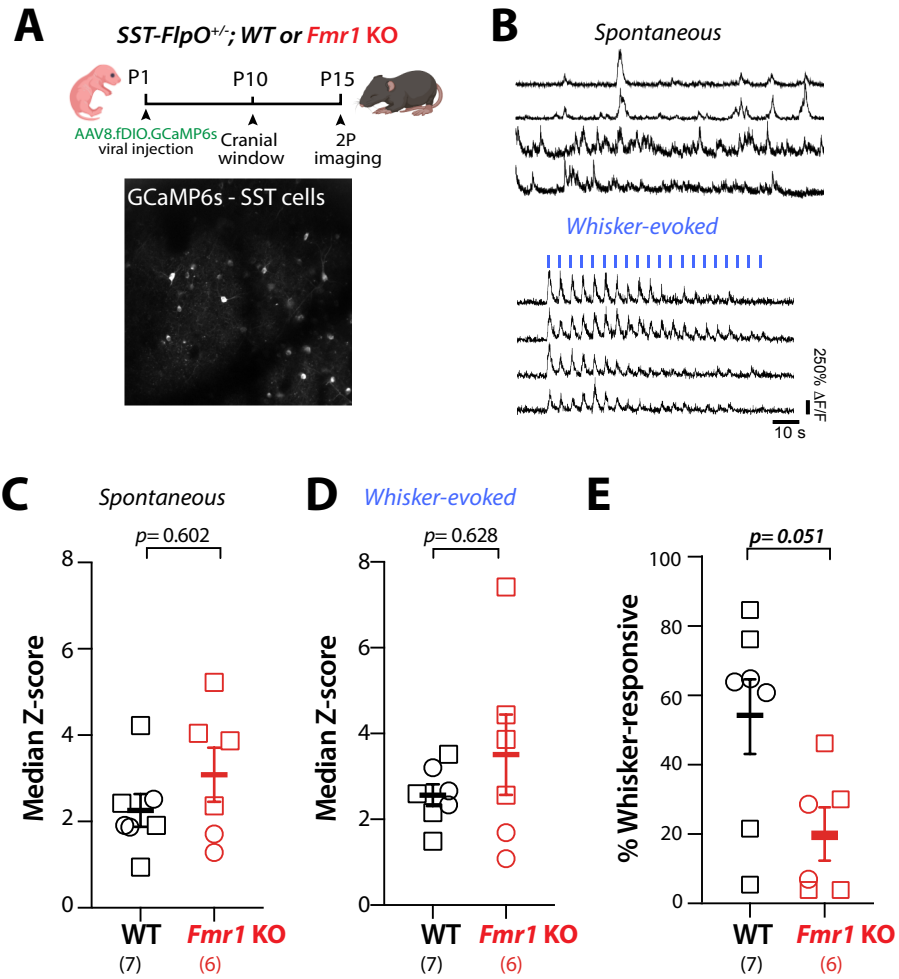

Supplementary Fig. S2

**Supplementary Fig. S2: Activity of SST INs in S1 of P15 *Fmr1* KO mice is not different from WT controls.** (Related to Fig. 1)

- A. Top: Cartoon of experimental design for calcium imaging recordings in SST-INs. Bottom: Example field of view of SST-INs expressing GCaMP6s in SST-FlpO mice at P15.
- B. Example traces of calcium transients for spontaneous and whisker-evoked activity in both SST-FlpO ; WT and SST-FlpO; *Fmr1* KO mice (we show traces from 2 different SST-INs of 2 different animals). The vertical blue bars represent the 20 whisker stimulations.
- C. Mean Z-scores for spontaneous activity of SST-INs in *Fmr1* KO and WT mice at P15 ( $2.56 \pm 0.38$  for WT vs.  $3.08 \pm 0.62$  for *Fmr1* KO, n=6 and 7 mice, respectively;  $p=0.602$ , MW t-test).
- D. Mean Z-scores for whisker-evoked activity of SST-INs in *Fmr1* KO and WT mice at P15 ( $2.56 \pm 0.25$  for WT vs.  $3.51 \pm 0.94$  for *Fmr1* KO,  $p=0.628$ , MW t-test).
- E. Percentage of whisker-responsive SST-INs in *Fmr1* KO and WT mice at P15 ( $53.8 \pm 11.0\%$  for WT vs.  $19.6 \pm 7.6\%$  for *Fmr1* KO,  $p= 0.051$ , M-W t-test).

Percentage of ChRmine<sup>+</sup> cells that express PVALB or SST in *Nkx2.1-Cre<sup>+/+</sup>;SST-FlpO<sup>+/-</sup>* mice at P10-12

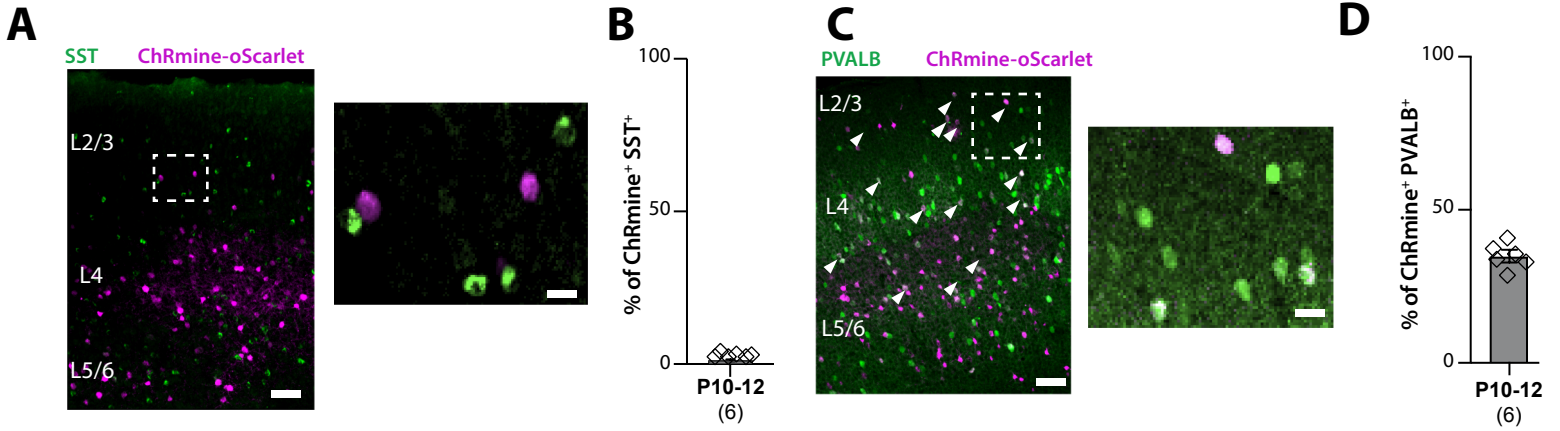

Effect of optogenetic activation of *Nkx2.1*<sup>+</sup> INs on network activity at P10 (excitatory cells)

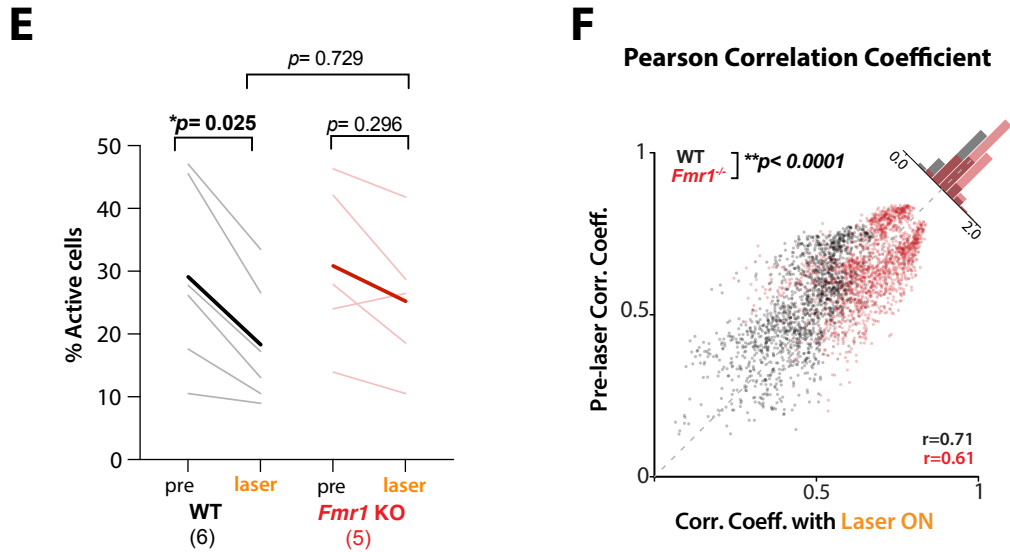

**G** Pyramidal cell activity in mCherry control mice

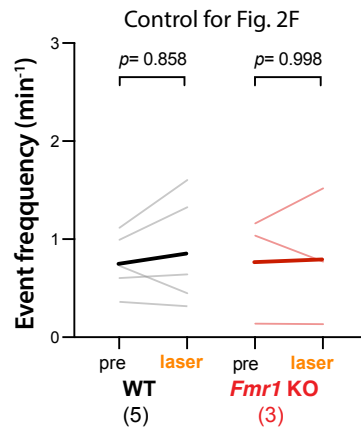

Supplementary Fig. S3

**Supplementary Fig. S3: Controls for optogenetic experiments to stimulate Nkx2.1-INs in an attempt to modulate Pyr neurons in neonatal *Fmr1* KO mice at P10.** (Related to Fig. 2)

- A. Example field of view in S1 of Nkx2.1-Cre;Sst-FlpO; *Fmr1* KO expressing ChRmine (magenta), using AAV-EF1-CreON/FlpOFF-ChRmine-oScarlet- virus) and immunostained for SST (green).
- B. Quantification of ChRmine<sup>+</sup> cells that also express either PVALB or SST (by immunohistochemistry). As expected almost none of the ChRmine-labeled cells were SST immunoreactive ( $1.2 \pm 0.4\%$ , n= 6 mice), confirming the intersectional strategy worked as intended to target Nkx2.1<sup>+</sup> but SST-FlpO<sup>+</sup> cells at P10.
- C. Example field of view in S1 of Nkx2.1-Cre;Sst-FlpO; *Fmr1* KO expressing ChRmine (same as in b) and immunostained for SST (green). White arrowheads indicate double labeled cells.
- D. Quantification of ChRmine<sup>+</sup> cells that are also immunoreactive for PVALB. Overall,  $34.9 \pm 2.1\%$  the ChRmine-labeled also expressed PVALB (n= 6 mice). This is consistent with the fact that at this developmental stage (P10-P12) not all future PV-IN have started expressing PVALB.
- E. The percentage of active Pyr cells is significantly reduced upon laser stimulation of ChRmine-expressing future PV-INs in WT mice but is unchanged in *Fmr1* KO mice ( $29.1 \pm 6.0$  pre laser vs.  $18.3 \pm 4.0$  laser On, p=0.025 in WT mice vs.  $30.9 \pm 5.9$  pre laser vs.  $25.2 \pm 5.2$  laser On in *Fmr1* KO mice, p=0.296, two-way ANOVA post-hoc Tukey).
- F. Change in pairwise correlation coefficients after optogenetic Nkx2.1-IN activation in Nkx2.1-Cre;Sst-FlpO mice for individual pairs of neurons (Spearman r=0.71, n=1,449 neuron pairs from n=6 WT mice; Spearman r=0.61, n=1,842 neuron pairs from n=5 *Fmr1*<sup>KO</sup> mice). Note that correlation coefficients are significantly reduced by laser stimulation in WT mice, but not in *Fmr1* KO mice, as shown by the frequency distribution (p<0.001, Kolmogorov-Smirnov test).
- G. Mean frequency of Pyr cell calcium transients remained unchanged upon optogenetic stimulation in Nkx2.1-Cre;Sst-FlpO WT and *Fmr1* KO mice that do not express the opsin ChRmine (mCherry controls;  $0.67 \pm 0.13$  pre laser vs.  $0.86 \pm 0.25$  laser On, p=0.312 in WT mice;  $0.78 \pm 0.32$  pre laser vs.  $0.81 \pm 0.4$  laser On, p=0.500, n=5 WT and n=3 *Fmr1* KO , two-way ANOVA, post-hoc Tukey).

### Spontaneous network activity at P10 in WT and *Fmr1* KO mice

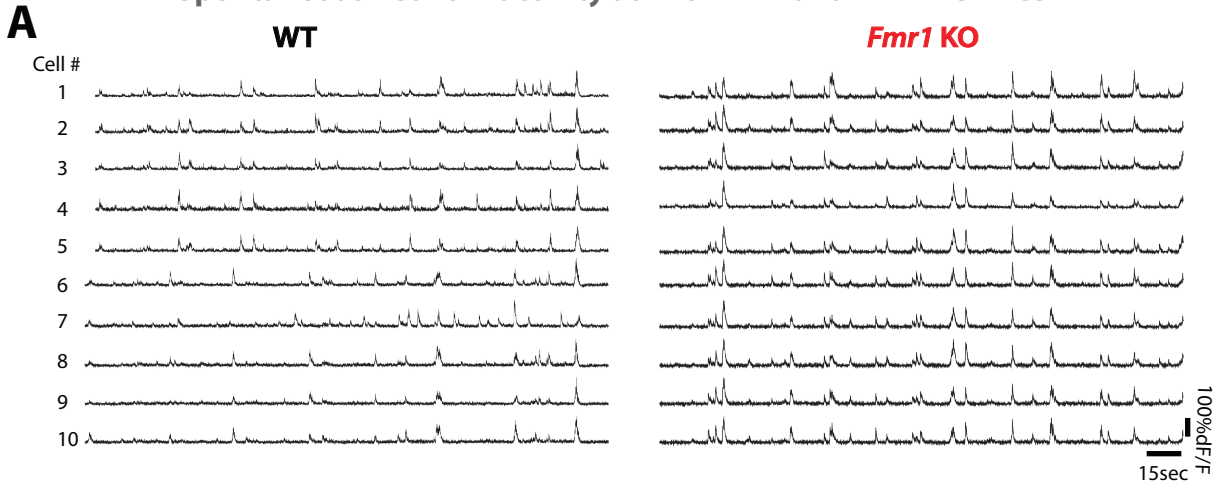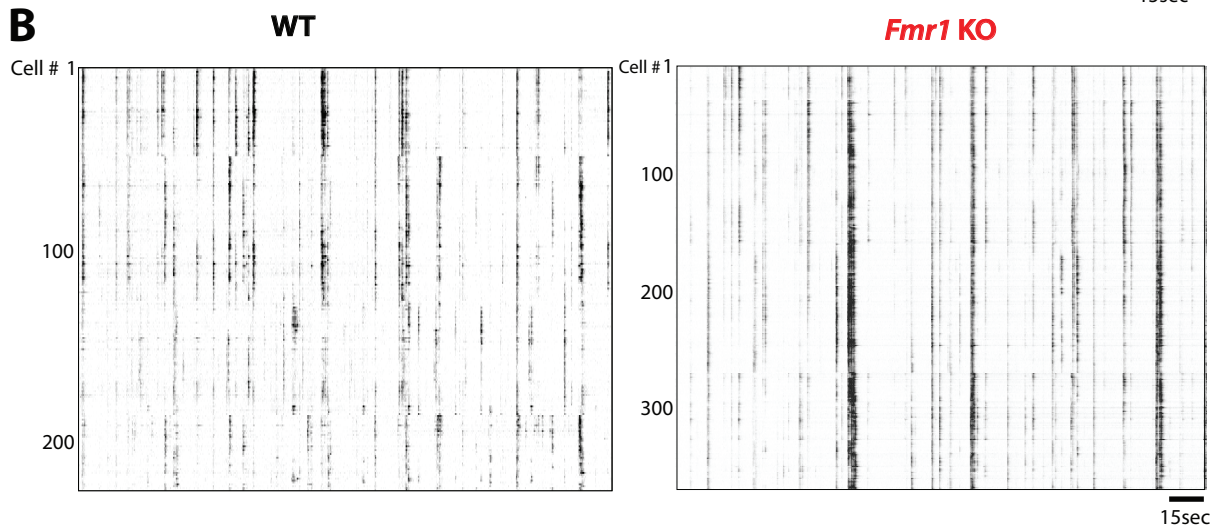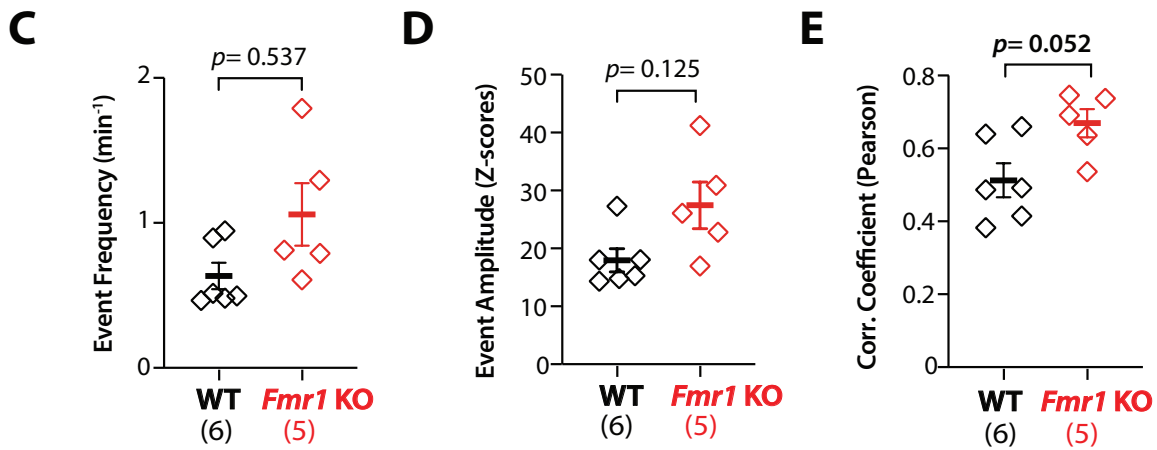

Supplementary Fig. S4



**Supplementary Fig. S4: Pyr cell activity at P10 in *Fmr1* KO is hypersynchronous.** (Related to Fig. 2)

- A. Representative calcium traces of 10 example Pyr neurons in S1 of P10 WT and *Fmr1*<sup>KO</sup>.
- B. Raster plots of Pyr cell activity in a representative WT and *Fmr1* KO mouse. Note the higher synchrony of network *Fmr1* KO.
- C. Mean frequency of Pyr cell calcium transients is not significantly different in WT and *Fmr1* KO mice ( $0.63 \pm 0.09$  in WT mice;  $1.60 \pm 0.21$ ,  $n=6$  WT and  $n=5$  *Fmr1* KO mice,  $p=0.537$  MW test).
- D. Mean amplitude of Pyr cell calcium transients is not significantly different in WT and *Fmr1* KO mice ( $23.6 \pm 2.00$  in WT mice;  $27.5 \pm 4.0$ ,  $n=5$  WT and  $n=6$  *Fmr1* KO mice,  $p=0.125$ , MW test).
- E. Mean pairwise correlation coefficients is higher in *Fmr1* KO mice as compared to WT ( $0.51 \pm 0.05$  in  $n=6$  WT mice;  $0.67 \pm 0.04$ , and  $n=5$  *Fmr1* KO mice,  $p=0.052$ , MW test).

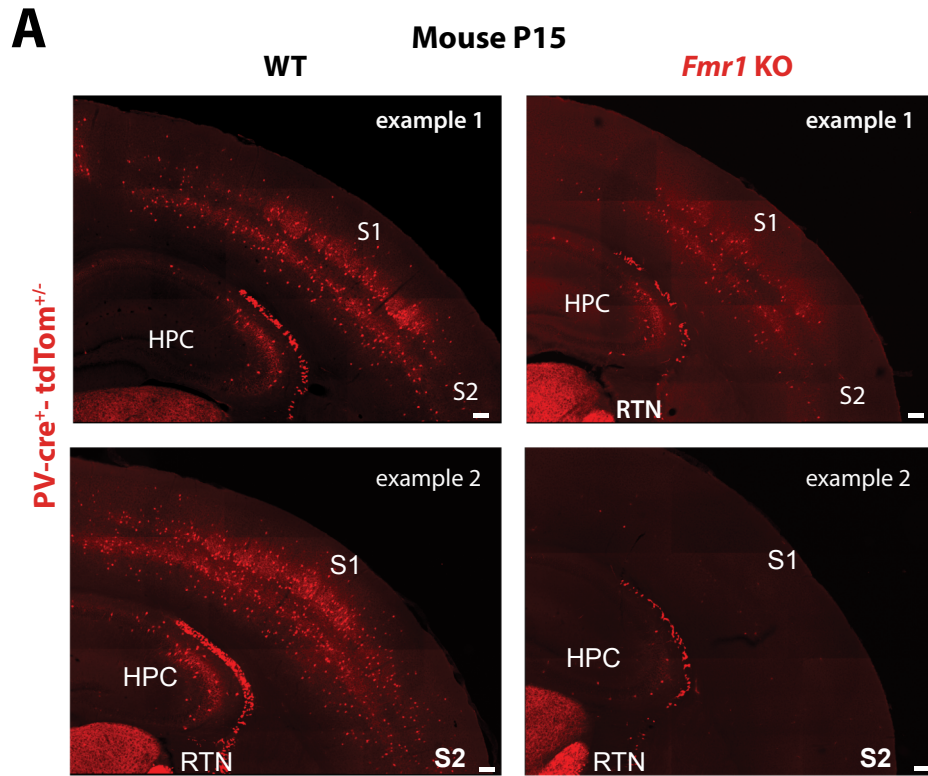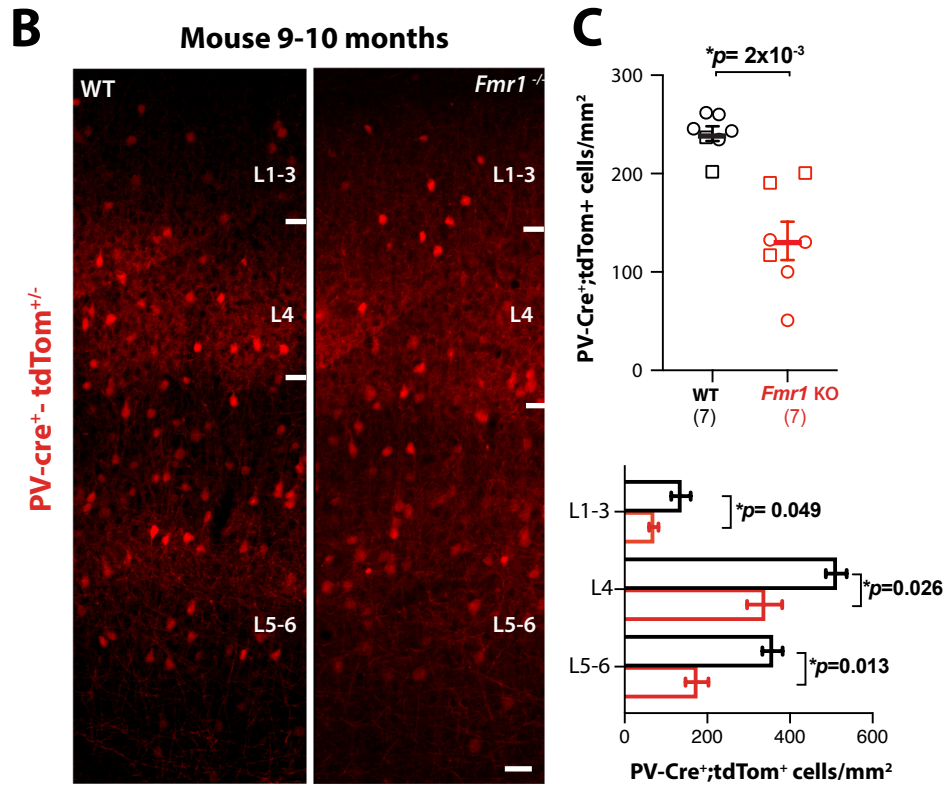

Supplementary Fig. S5

**Supplementary Fig. S5: Reduced PV-IN density in *Fmr1* KO mice at P15 and at 9-10 months.**

(Related to Fig. 3)

- A. Example coronal sections through S1 from *PV-Cre;tdTom<sup>+/-</sup>* mice (WT and *Fmr1<sup>KO</sup>*) at P15 showing the range of PV-IN density in *Fmr1* KO mice across the dorsal brain. Notably some *Fmr1* KO mice (example 2) exhibit a dramatic loss of PV-INs in neocortex and hippocampus (HPC), while other brain regions, such as the reticular thalamic nucleus (RTN) are much less affected. S2: secondary somatosensory cortex. Scale=100  $\mu$ m.
- B. Coronal sections through the barrel field of S1 from *PV-Cre;tdTom<sup>+/-</sup>* mice (WT and *Fmr1* KO) at 9-10 months (corresponding approximately to age of human tissue in Fig. 3C-D). Scale= 50  $\mu$ m.
- C. Mean density of PV-tdTom<sup>+</sup> INs in S1 is significantly lower in adult *Fmr1* KO mice (top), even across individual cortical layers (bottom). (all layers:  $241 \pm 8$  cells/mm<sup>2</sup> for WT vs.  $132 \pm 2$  for *Fmr1* KO;  $p=0.002$ , MW *t*-test; L2/3:  $136 \pm 23$  vs.  $69 \pm 10$ ,  $p=0.049$ , L4:  $512 \pm 26$  vs.  $339 \pm 43$ ,  $p=0.026$ ; L5/6:  $358 \pm 24$ , two-way ANOVA, post-hoc Holm-Sidak test,  $p=0.013$ ,  $n=7$  per genotype).

SST-IN density in 15 day-old and adult WT and *Fmr1* KO mice

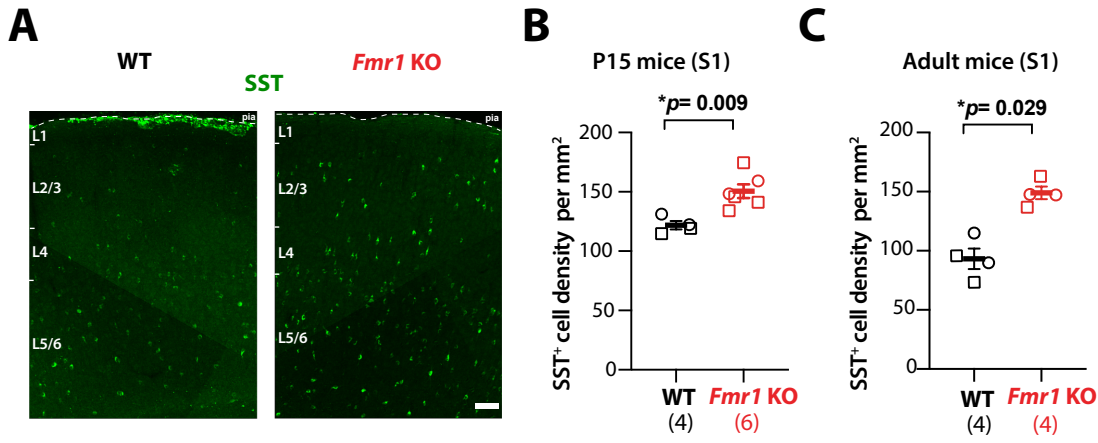

Density of Calretinin- and Calbindin-expressing interneurons subtypes in adult adult WT and *Fmr1*<sup>-/-</sup> mice

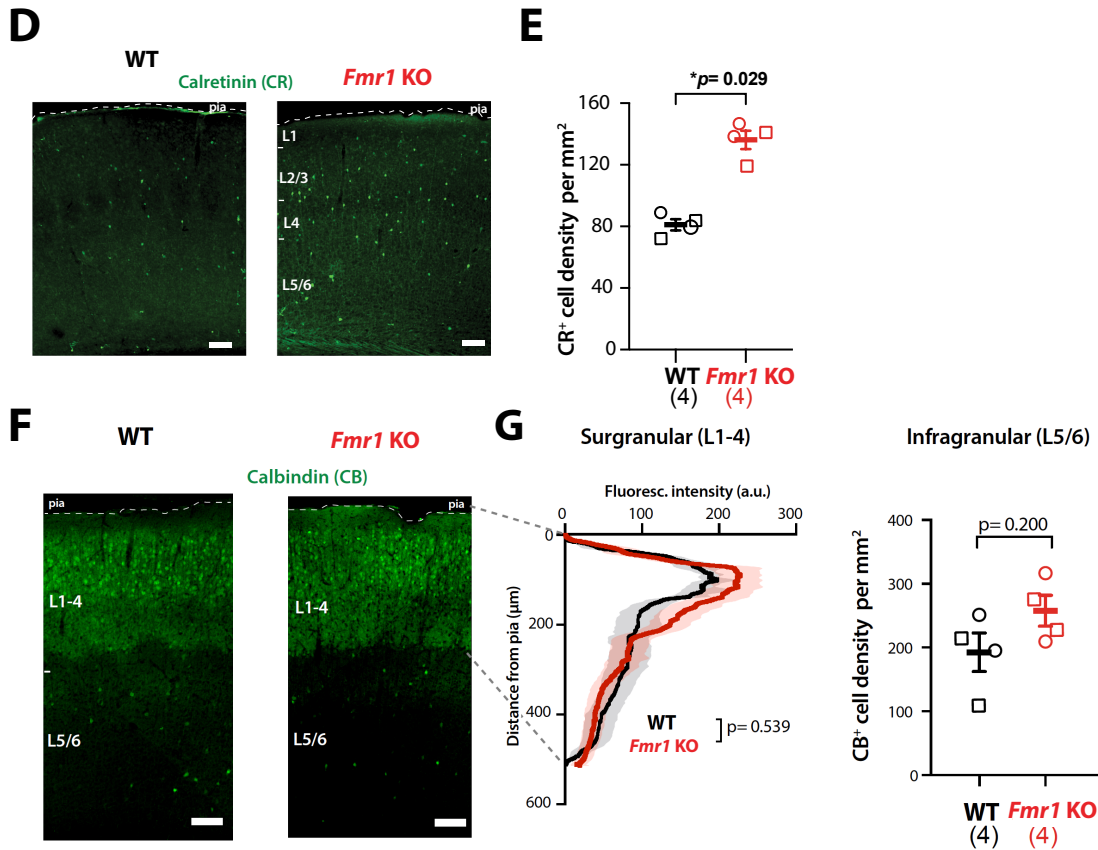

Density of Calretinin- and Calbindin-expressing interneurons in human samples

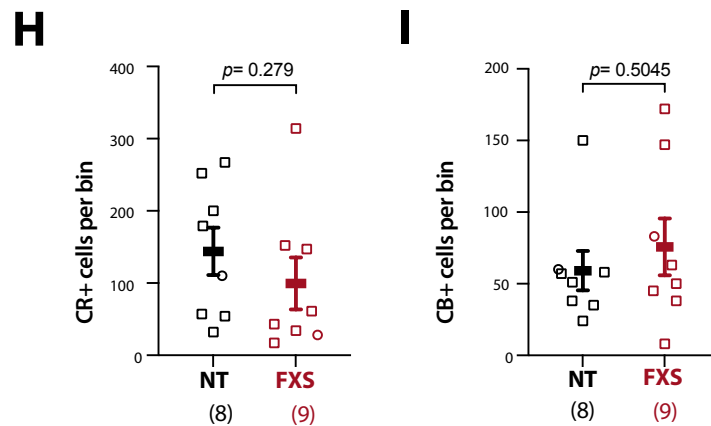

**Supplementary Fig. S6: Density of SST, Calbindin, and Calretinin INs in FXS human cases and *Fmr1* KO mice.** (Related to Fig. 3)

- A. Representative images of SST immunostaining in S1 in P15 WT and *Fmr1* KO mice.
- B. Quantification of total SST-immunoreactive cell density in the barrel field of S1 in WT and *Fmr1* KO mice in P15 (WT:  $121.9 \pm 3.7$  cells/mm<sup>2</sup>, *Fmr1* KO:  $150.5 \pm 5.9$ , n= 4 and 6, respectively; p=0.009, MW test).
- C. Quantification of total SST-immunoreactive cell density in adult (4-5 months old) WT and *Fmr1* KO mice in and adult mice (WT:  $93.14 \pm 8.6$  cells/mm<sup>2</sup>, *Fmr1* KO:  $149.1 \pm 5.3$ , n= 4 per group; p=0.029, MW test)
- D. Representative images of Calretinin immunostaining in S1 in adult WT and *Fmr1* KO mice.
- E. Quantification of Calretinin-immunoreactive INs from adult WT and *Fmr1* KO mice ( $81 \pm 3.6$  for WT vs.  $136 \pm 5.9$  for *Fmr1* KO, n=4 mice per group; p=0.029 MW *t* test).
- F. Representative images of Calbindin immunostaining in S1 in adult WT and *Fmr1* KO mice. Note that the CB immunoreactivity is similar to previous reports.<sup>2,3</sup>
- G. Quantification of Calbindin-immunoreactive INs in WT and *Fmr1* KO mice. The distribution and intensity of fluorescence is comparable in between WT and *Fmr1* KO mice in the supragranular layers (AUC=  $48,036 \pm 704$  for WT vs.  $42,093 \pm 578$  for *Fmr1* KO, n=4 mice per group; p=0.539, MW *t* test). The density of CB<sup>+</sup> INS in infragranular layers is similar between WT and *Fmr1* KO mice ( $192.6 \pm 30.2$  for WT vs.  $257.7 \pm 24.2$  for *Fmr1* KO; p=0.200, MW *t* test).
- H. Quantification of Calbindin-immunoreactive INs in human FXS and neurotypical control (NT) cases ( $59 \pm 14$  for NT vs.  $76 \pm 20$  for FXS, n=8 and 9, respectively; p=0.279 MW *t* test).
- I. Quantification of Calretinin-immunoreactive INs in FXS human and control (NT) cases ( $144 \pm 33$  for NT vs.  $100 \pm 36$  for FXS; p=0.279 MW *t* test).

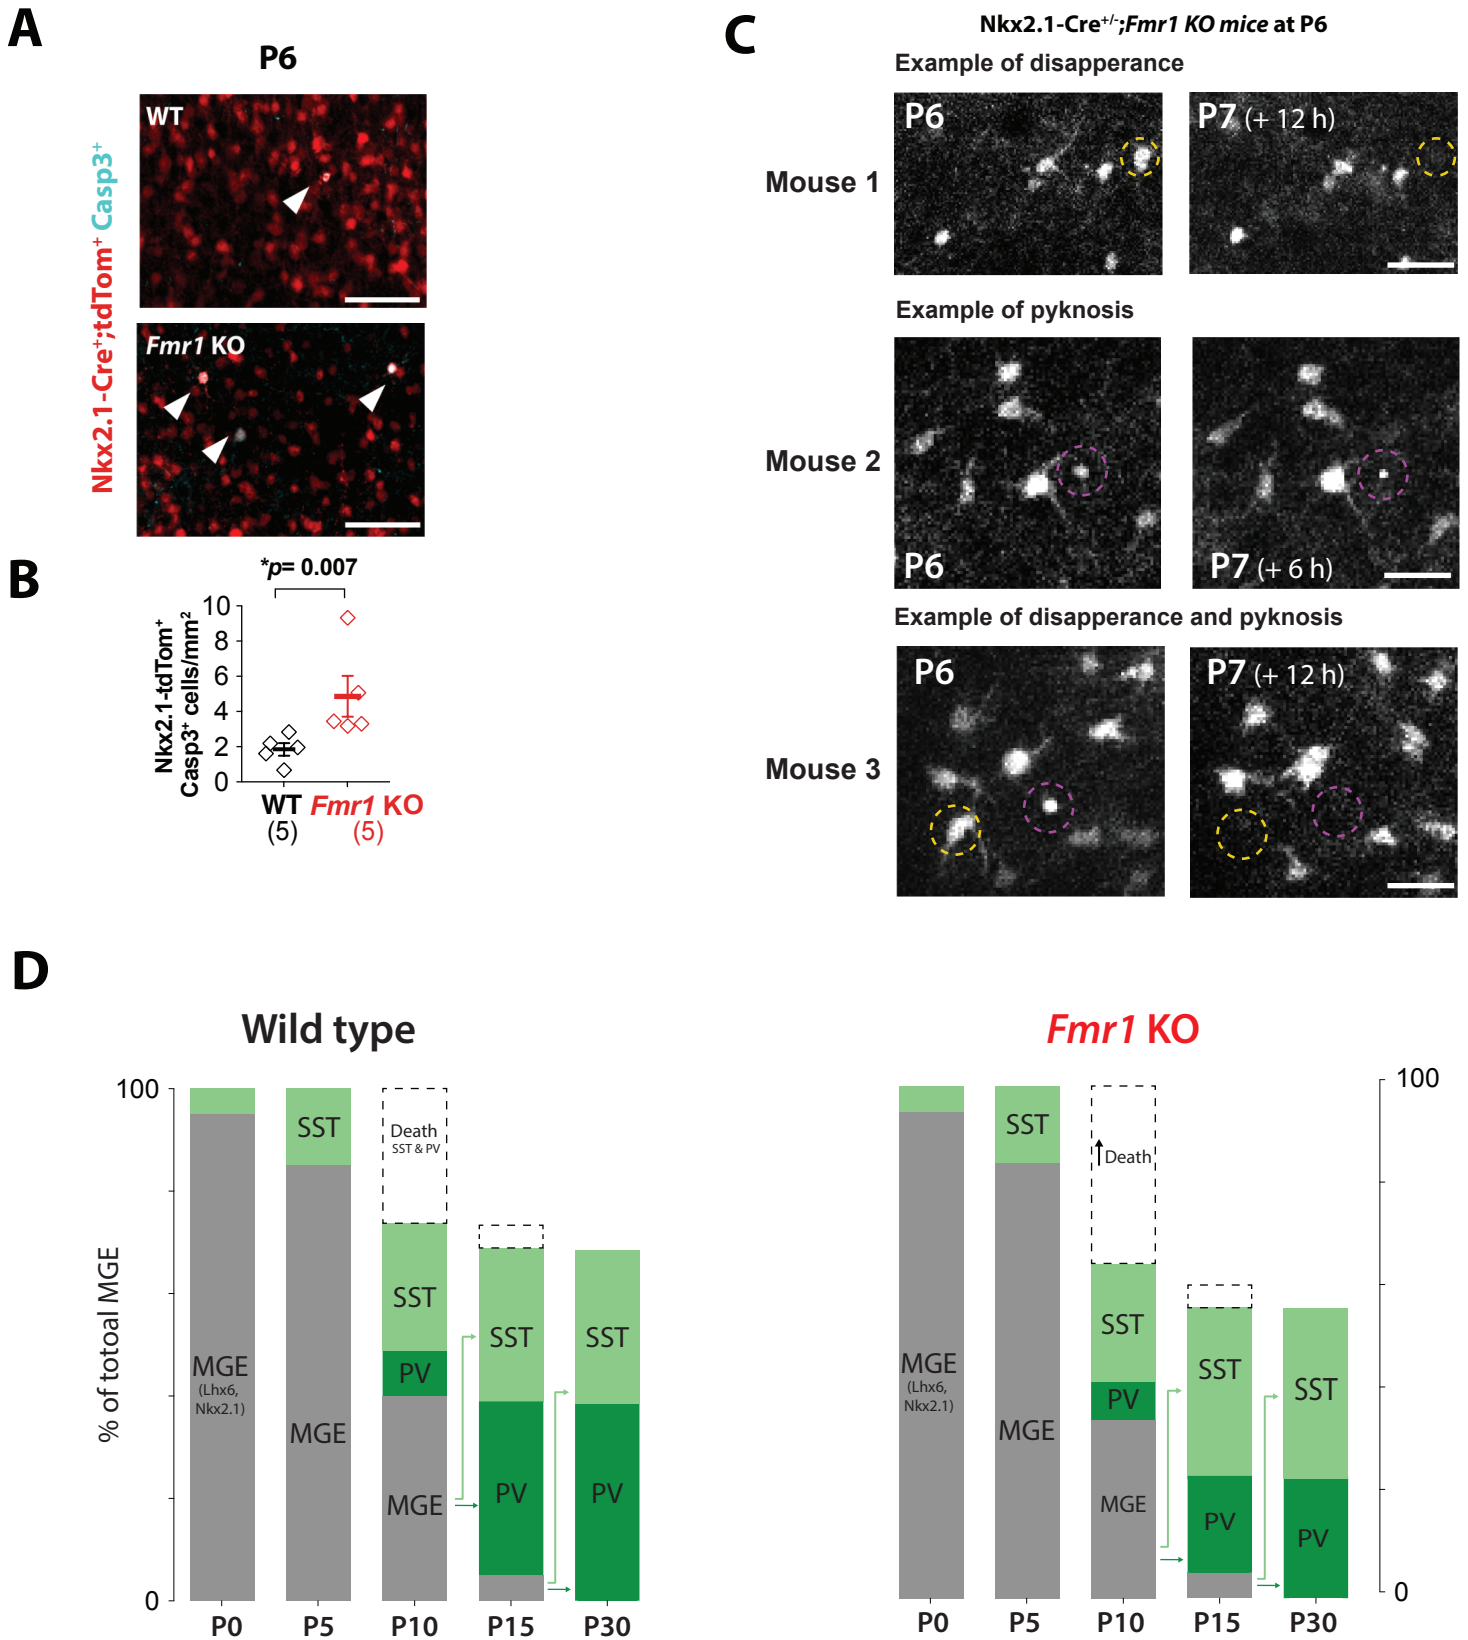

**Supplementary Fig. S7**

**Supplementary Fig. S7: Evidence of apoptotic cell death of *Nkx2.1*-tdTom<sup>+</sup> INs in neonatal *Fmr1* KO mice.** (Related to Fig. 3)

- A. Coronal sections through S1 from *Nkx2.1-Cre* mice (WT and *Fmr1* KO) at P6 immunostained for cleaved Caspase-3 (cyan) showing rare double-labeled cells (arrowheads). Scale= 100  $\mu$ m.
- B. Mean density of *Nkx2.1*<sup>+</sup>-tdTom<sup>+</sup>-INs that co-express Caspase-3 was significantly higher in *Fmr1* KO mice ( $1.85 \pm 0.35$  cells/mm<sup>2</sup> for WT vs.  $4.87 \pm 1.16$  for *Fmr1* KO;  $p=0.007$ , M-W test).
- C. Representative maximum intensity projection ( $\sim 20$   $\mu$ m) of *Nkx2.1*-tdTom<sup>+</sup> IN image stacks acquired by in vivo 2P microscopy of the same FOV at P6 and 6-12h later in 3 example *Nkx2.1-Cre;Ai14*<sup>+/-</sup>; *Fmr1* KO mice. Yellow dotted contours indicate *Nkx2.1*-tdTom<sup>+</sup> INs present at P6 but absent at P7. Purple dotted contours indicate pyknotic *Nkx2.1*<sup>+</sup>-tdTom<sup>+</sup>-INs, indicative of apoptosis. Scale= 50  $\mu$ m.
- D. Cartoon representing developmental sequence of events related to differentiation of MGE-derived INs into SST and PV populations in WT (left) and *Fmr1* KO mice (right). Note that in WT mice, SST-INs differentiate before PV-INs, that naturally occurring cell death of SST-INs and PV-INs occurs roughly between P5 and P10, and that additional differentiation of PV-INs from MGE-derived precursors goes on after P15. In contrast, in *Fmr1* KO mice, there is 1. A lower density of PV-INs (due to an excess cell death), and 2. a higher density of SST-INs (presumably due to less cell death and/or greater differentiation from MGE-INs) compared to WT mice.

Chronic DREADD manipulation (P5 to P9)  
in *Nkx2.1-Cre<sup>+/+</sup>*; WT or *Fmr1* KO

Percentage of mCherry<sup>+</sup> cells among PVALB<sup>+</sup>-IN

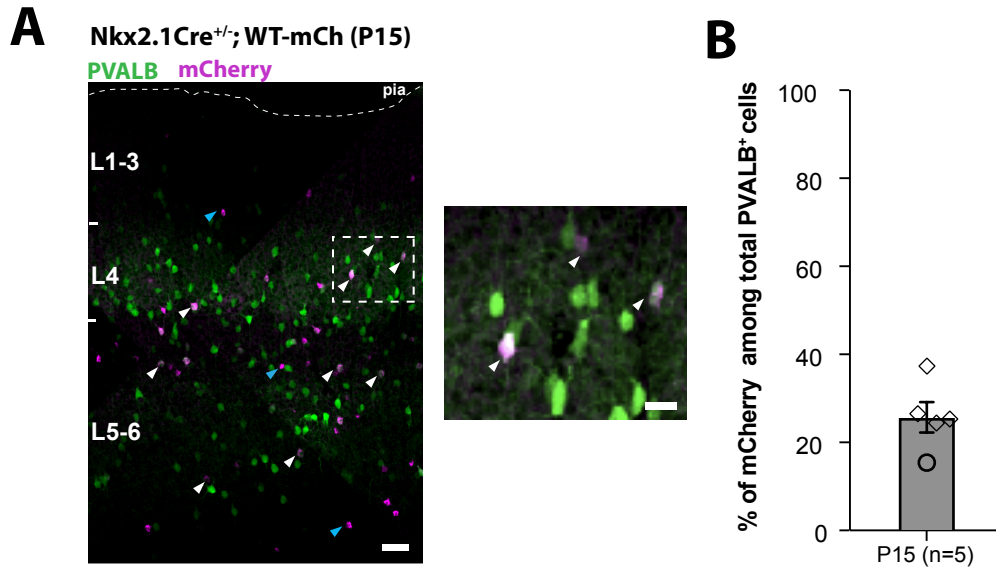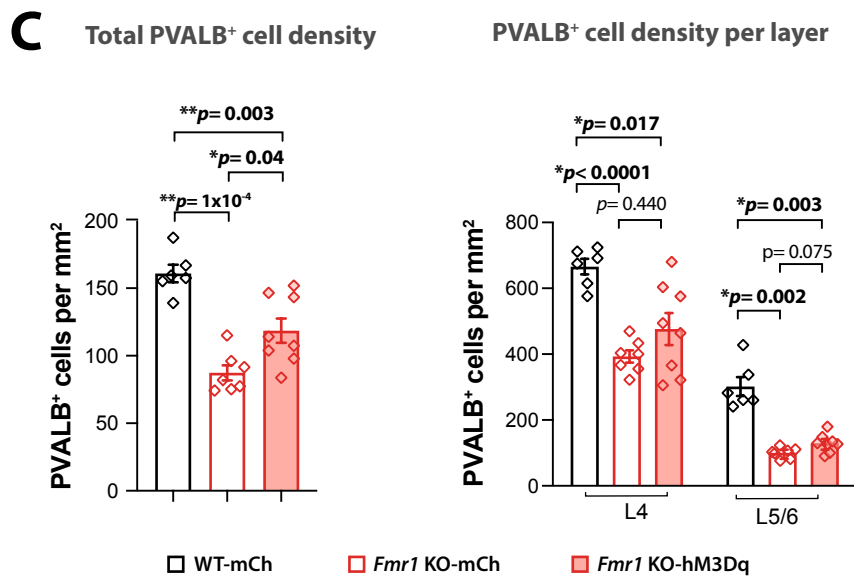

Supplementary Fig. S8



**Supplementary Fig. S8: Chronic chemogenetic activation of Nkx2.1-INs (P5-P9) increases the density of PVALB<sup>+</sup> cells at P21.** (Related to Fig. 4)

- A. Coronal section through the barrel field of S1 in a P15 Nkx2.1-Cre;WT mouse expressing mCherry in Nkx2.1<sup>+</sup>-IN (see Methods). Note the overlap in expression of mCherry (purple) in Nkx2.1<sup>+</sup>-IN and PVALB immunoreactivity (green) across cortical layers (white arrowheads). As expected based on the low efficiency of viral transduction, only a small proportion of PVALB<sup>+</sup> cells co-express mCherry (and the Gq DREADD construct) (blue arrowheads). Scale= 50 $\mu$ m.
- B. Percentage of PVALB<sup>+</sup> INs that also express mCherry. ( $25.8 \pm 3.5$  cells/mm<sup>2</sup>, n=5 mice).
- C. Left: Quantification of PVALB<sup>+</sup> INs density across cortical layers at P15. ( $161 \pm 6$  cells/mm<sup>2</sup> for WT-mCherry vs.  $87 \pm 6$  for *Fmr1* KO-mCherry, p= 0.003; and  $119 \pm 9$  for *Fmr1* KO-h3MDq, p= 0.040, n=6, 7 and 8, respectively). Right: the chronic DREADD manipulation did not significantly change the density of PV-INs in L4 or L5/6.

**A**

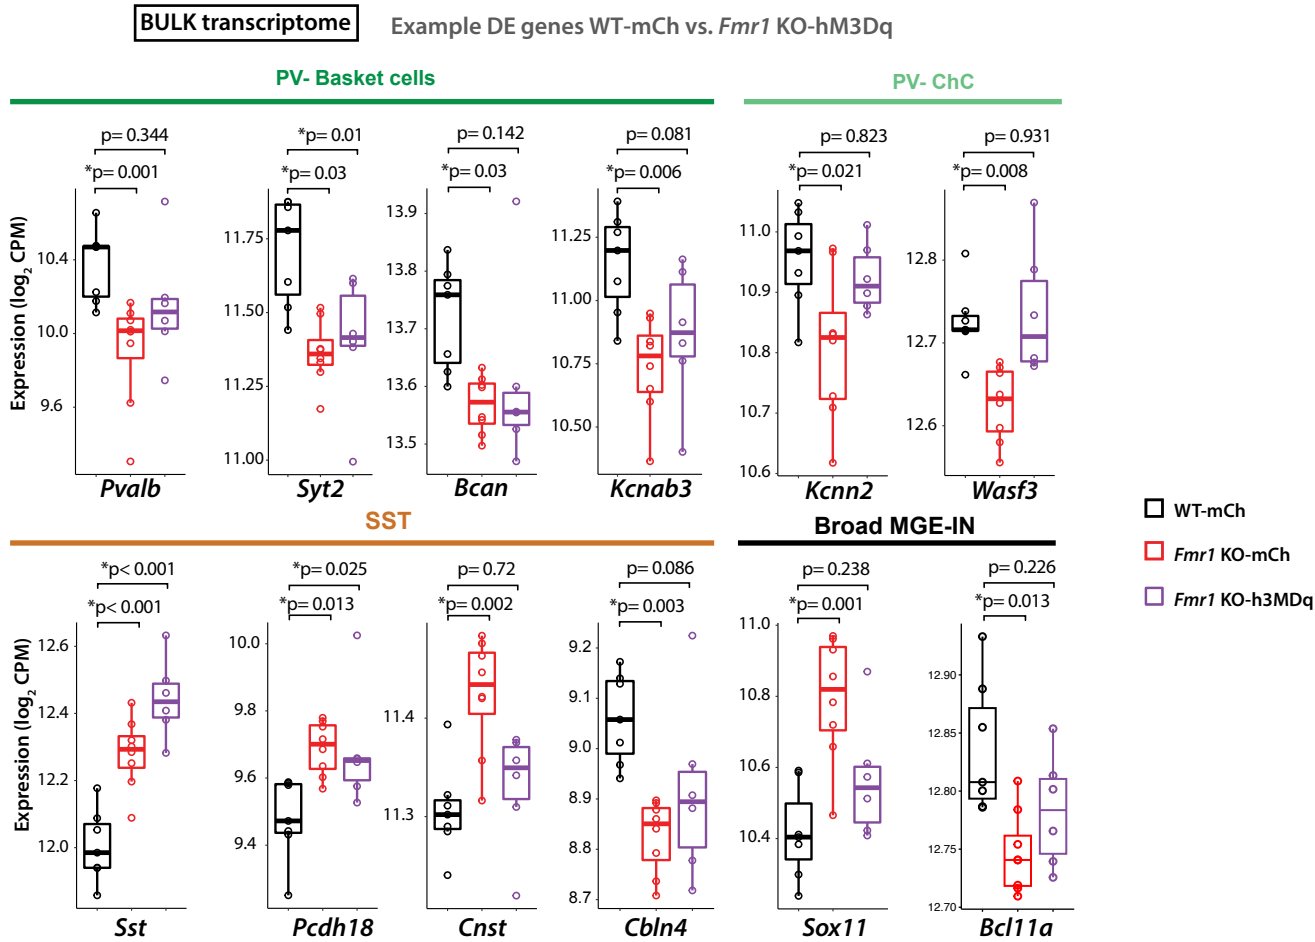

**B**

**BULK transcriptome**  
Overlap of global cortical transcriptome with other RNAseq studies

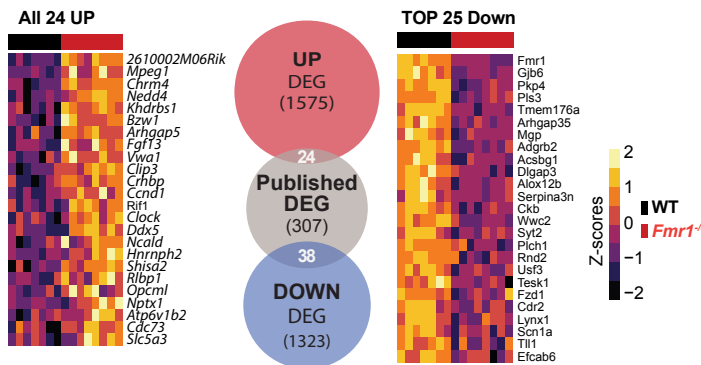

**C**

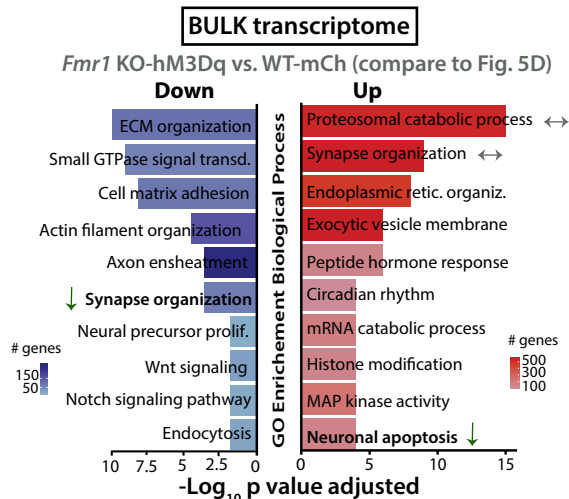

**D**

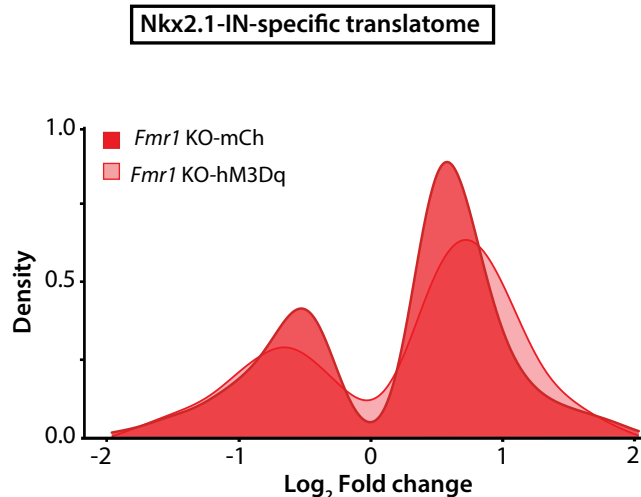

**E**

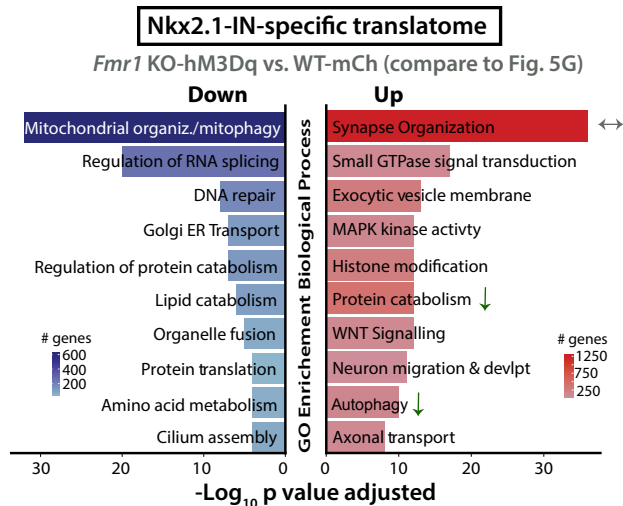

**Supplementary Fig. S9: Gene ontology (GO) analysis for DE genes in *Fmr1* KO-hM3Dq mice compared to WT-mCherry mice, and effect of Gq DREADD manipulation.** (Related to Fig. 5)

- A. Whisker plots comparing the expression of several MGE-derived markers in the bulk transcriptome. Markers shown for PV-INs, including fast-spiking basket cells and chandelier cells, and SST-INs markers; Wilcoxon signed-rank test.
- B. Number of DE genes in S1 cortex at P15 *Fmr1* KO-mCherry from the bulk transcriptome that overlap with previously reported differentially expressed in the hippocampus of adult *Fmr1* KO mice (see Methods). Heatmaps represent the changes of expression expressed as Z-scores among the up- and downregulated genes.
- C. Top 10 GO terms (using the biological process package) enriched among downregulated (blue) and upregulated (red) genes from the bulk cortical transcriptome in *Fmr1* -hM3Dq vs. WT-mCherry mice. Scale bars represent the number of genes in each category. Note that “*Synapse organization*” and “*Neuronal apoptosis*” categories are less different (reduced number of genes and adjusted p value) than in the comparison shown in Fig. 5D between *Fmr1* KO (mCherry) and WT (mCherry) mice, suggesting they were ‘improved’ by the chemogenetic activation of Nkx2.1-INs.
- D. Density plot showing how the log<sub>2</sub> fold change was affected by the DREADD manipulation in the Nkx2.1-IN specific transcriptome. Note that differences with WT mice were accentuated by the DREADD intervention in both down- and upregulated categories.
- E. Top 10 GO terms for DE genes from the Nkx2.1-specific transcriptome in *Fmr1* KO -hM3Dq vs. WT-mCherry mice. Only a few GO terms were modestly improved by DREADDs (e.g., *Protein catabolism* and *Autophagy*).

# A "Synaptic organization" GO terms changed by DREADDs in *Fmr1* KO mice: Bulk transcriptome

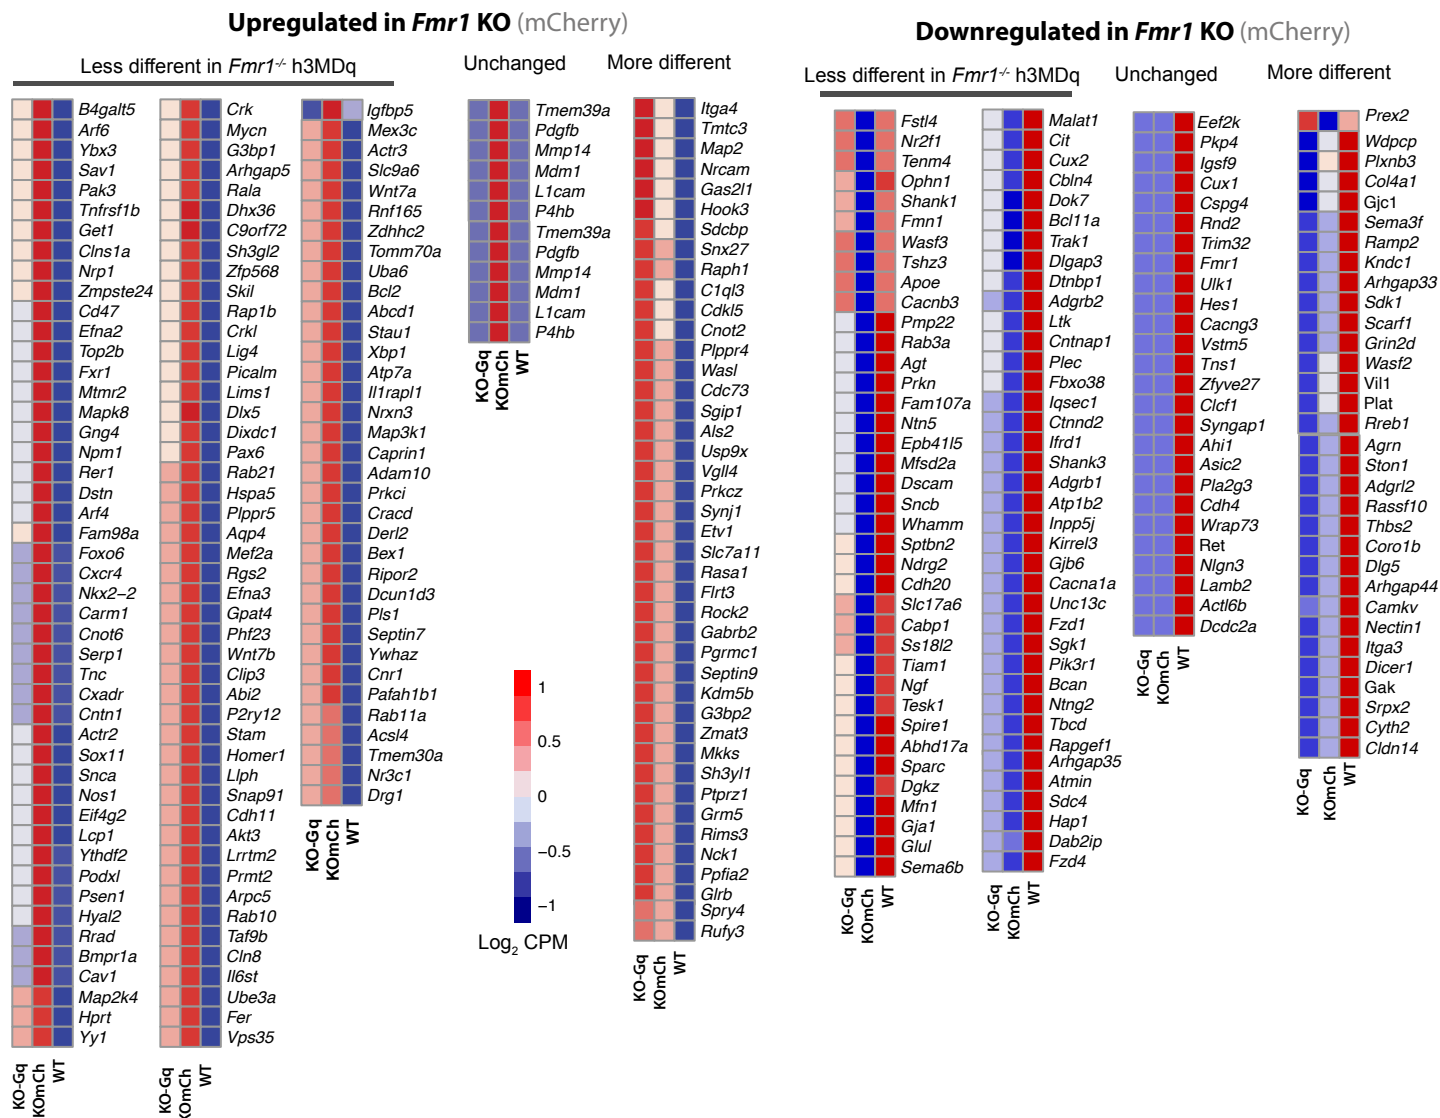

# B "Neuron apoptosis" GO terms modified in *Fmr1* KO-h3MDq

**BULK transcriptome**

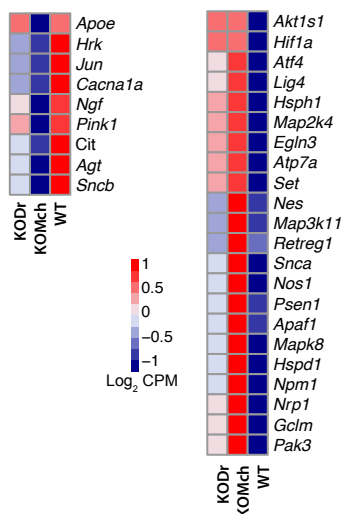

**Nkx2.1-IN-specific transcriptome**

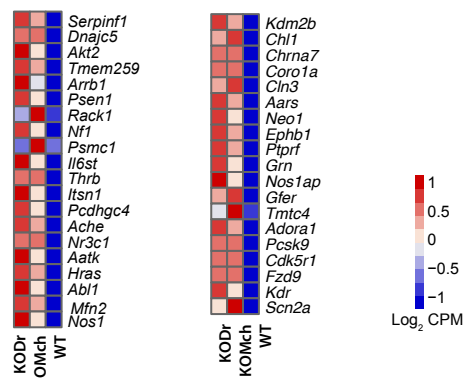

**Supplementary Fig. S10: Gene expression levels changed by C21 treatment in *Fmr1* KO-hM3Dq mice.** (Related to Fig. 6)

- A. List of upregulated or downregulated genes among the GO term *Synapse organization* in *Fmr1* KO-mCherry and hM3Dq groups (as compared to WT-mCherry) within the bulk cortical transcriptome. Heatmaps represent the average for each treatment/genotype group in ( $\log_2$  CPM). Note that, while DREADD treatment reduced differences for many genes. The expression of other genes was either unchanged or worsened after C21 treatment.
- B. Same as in panel A but for GO term "*Neuronal apoptosis*." In both bulk transcriptome (left) and Nkx2.1-IN specific translome (right).

**A**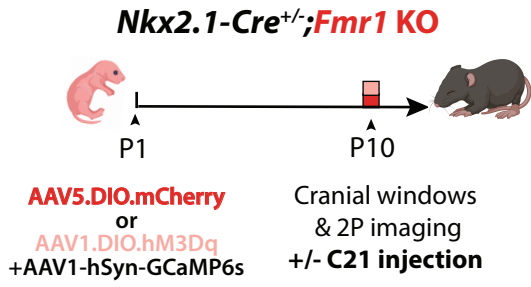**B**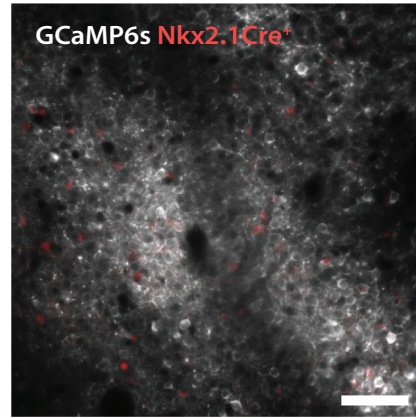**C**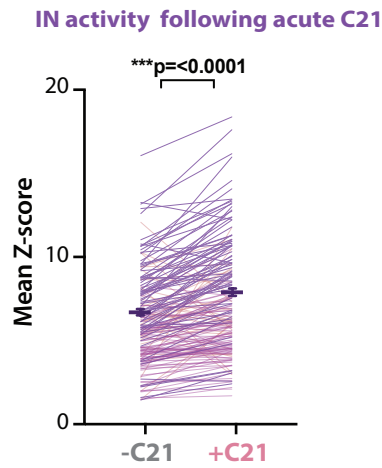**D**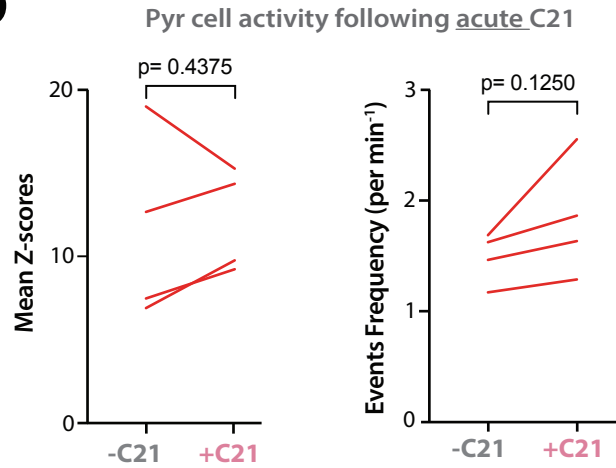**E**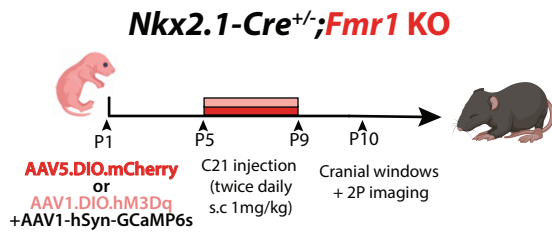**F**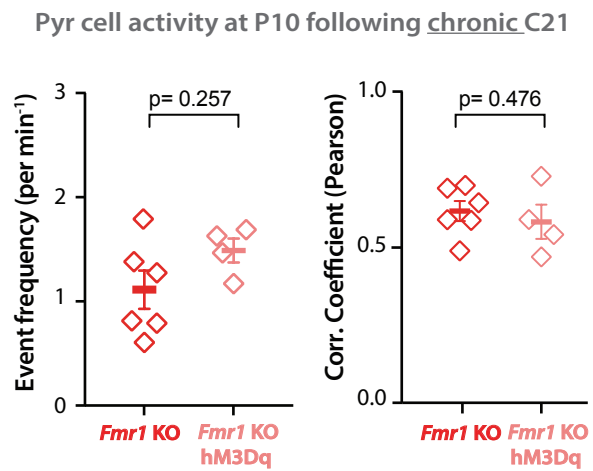

**Supplementary Fig. S11: Acute chemogenetic activation of Nkx2.1-INs at P10 or chronic activation from P5 to P9, fails to modulate Pyr cell activity.** (Related to Fig. 7)

- A. Experimental design for acute chemogenetic activation of Nkx2.1-INs at P10 in *Fmr1* KO mice to assess cortical circuit activity using in vivo calcium imaging at P10.
- B. Example FOV of Pyr cells expressing GCaMP6s and Nkx2.1-hM3Dq<sup>+</sup> IN in S1 of *Nkx2.1-Cre; Fmr1* KO mouse (scale=100 $\mu$ m).
- C. Mean Z-scores of Nkx2.1-INs before (-C21) and 30-40min after s.c. injection of C21 (+C21) in P10 *Fmr1* KO-hM3Dq mice. Mean activity of Nkx2.1-INs is significantly higher following C21 injection (-C21:  $6.61 \pm 0.19$  and +C21:  $7.83 \pm 0.23$ , n= 182 cells from 3 mice; p<0.0001, Wilcoxon matched-pairs signed rank test).
- D. Left: Mean Z-scores of Pyr cells before (-C21) and 30-40min after (+C21) s.c. injection of C21 (1mg/kg) in P10 *Fmr1* KO-hM3Dq mice. Acutely increasing the activity of Nkx2.1-INs had no effect on Pyr cell activity (-C21:  $11.52 \pm 2.82$  and +C21:  $12.16 \pm 1.55$ , p=0.437, Wilcoxon matched-pairs signed rank test). Right: the mean frequency of synchronous network events (Pyr cells) remained unchanged after C21 in P10 *Fmr1* KO-hM3Dq mice. (-C21:  $1.48 \pm 0.11$  and +C21:  $1.83 \pm 0.26$  events/min, n= 4 mice; p=0.125, Wilcoxon matched-pairs signed rank test).
- E. Experimental design for chronic chemogenetic activation of Nkx2.1-INs (from P5 to P9) in *Fmr1* KO mice to assess cortical circuit activity using in vivo calcium imaging at P10.
- F. Left: Mean frequency of Pyr cell calcium transients at P10 was not significantly different *Nkx2.1-Cre; Fmr1* KO -hM3Dq mice after chronic C21 injections from P5 to P9 compared to *Fmr1* KO mice ( $1.11 \pm 0.18$  in *Fmr1* KO n=6 vs.  $1.48 \pm 0.11$  events per min in *Fmr1* KO-hM3Dq mice n=4, p=0.257, MW test test). Right: Mean pair-wise correlation coefficients of Pyr cell calcium transients is unchanged in *Fmr1* KO-hM3Dq mice following chronic C21 injection from P5 to P9 ( $0.66 \pm 0.03$  in *Fmr1* KO n=6, and  $0.62 \pm 0.05$  in *Fmr1* KO-hM3Dq mice n=4, p=0.476 MW test). Note that 1 animal was a new *Fmr1* KO-mCherry control, while the other 5 mice are *Fmr1* KO from Fig S4C-E.

# Acute DREADD manipulation of PV-IN reduces spontaneous Pyr cell activity in P15 Fmr1 KO mice

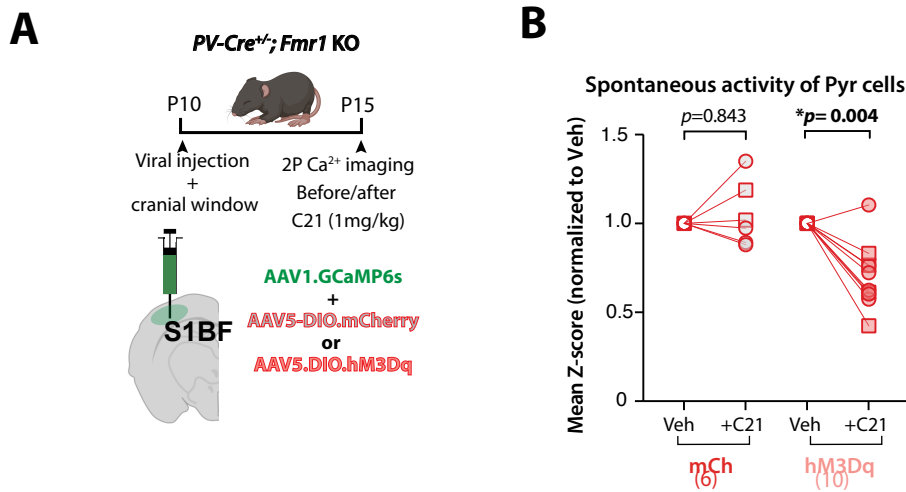

# Acute optogenetic manipulation of MGE-IN reduces Pyr cell activity P15 Fmr1 KO mice

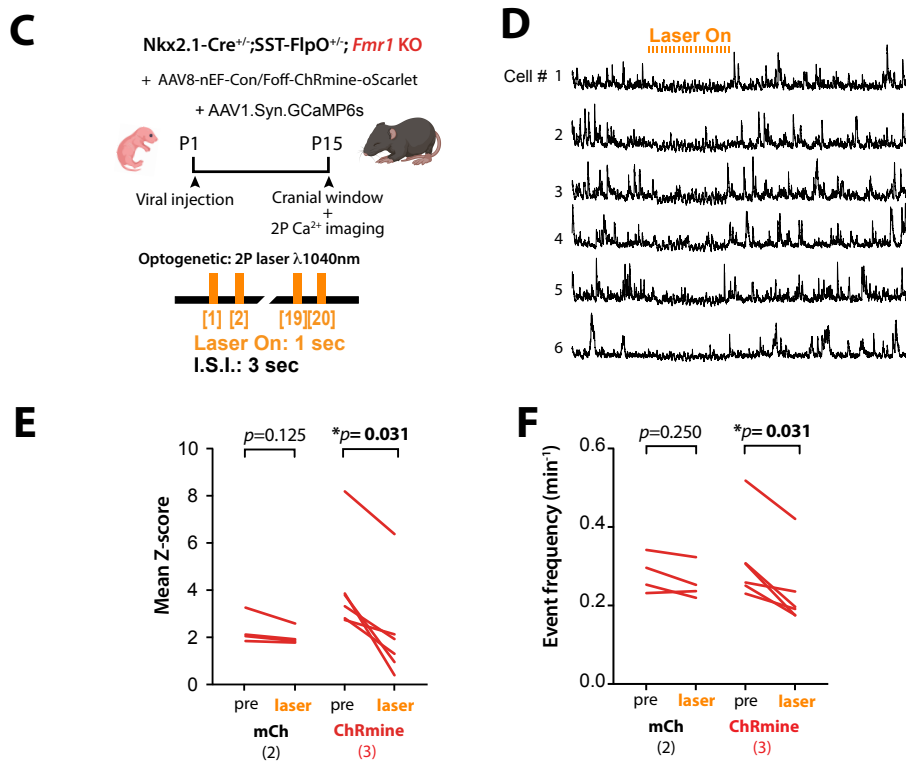

# Acute DREADD manipulation of PV-IN modulates whisker-evoked responses

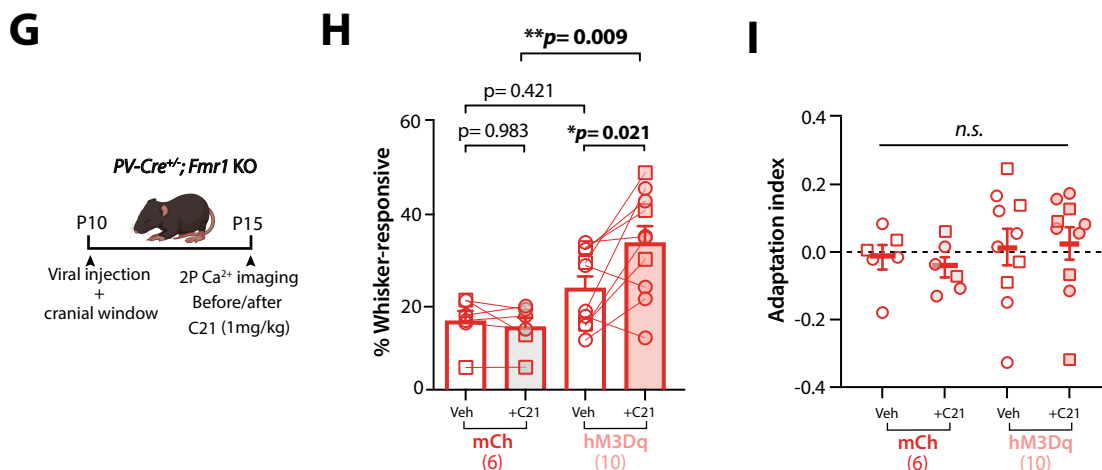

Supplementary Fig. S12



**Supplementary Fig. S12: Acute chemogenetic or optogenetic activation of INs reduces Pyr cell activity at P15 in *Fmr1* KO mice.** (Related to Figs. 7 and 8)

- A. Experimental design for in vivo calcium imaging recordings in Pyr cells after acute chemogenetic activation of PV-INs at P15. Calcium imaging was performed at P15 before and 30-40min after s.c injection of C21.
- B. Mean Z-score for spontaneous activity of L2/3 Pyr cells is reduced upon C21 injection in *Fmr1* KO -hM3Dq mice but not in *Fmr1* KO mCherry controls (before/after C21:  $3.9 \pm 0.7$  vs.  $4.0 \pm 0.6$  in mCherry group,  $p=0.843$ ; and  $2.3 \pm 0.3$  vs.  $1.6 \pm 0.3$ ,  $p=0.004$  in hM3Dq group;  $n=6$  and  $10$  mice, respectively; Wilcoxon matched pair signed rank test).
- C. Experimental design for optogenetic experiments. *Nkx2.1*-Cre mice (*Fmr1* KO or WT) were injected with a CreOn/FlpOff-ChRmine virus at P1 to express the opsin ChRmine in *Nkx2.1*-Cre<sup>+</sup>; Sst-FlpO-INs. Calcium imaging was done at P15 before, during, and after 20 laser pulses of orange light (1 s-long, 3 s I.S.I.,  $\lambda=1,040$  nm), just as in Fig. 2.
- D. Representative calcium traces for 6 Pyr cells (black) upon 2P laser stimulation.
- E. Mean Z-score of activity in Pyr cells before (pre) and during optogenetic stimulation (laser) in *Fmr1* KO mice. Each line in the panel represents an individual field of view. We observe a significant reduction of Pyr cell activity upon laser stimulation in ChRmine-expressing mice but not in control mCherry mice ( $2.32 \pm 0.32$  pre vs.  $2.03 \pm 0.18$  with laser;  $p=0.125$ ;  $n=4$  FOV from 2 control mice);  $4.12 \pm 0.83$  pre vs.  $2.18 \pm 0.87$  with laser;  $n=6$  FOV from 3 ChRmine-expressing mice;  $p=0.019$ . Wilcoxon matched-pairs signed rank test).
- F. Mean event frequency of calcium transients of Pyr cells before (pre) and during optogenetic stimulation (laser) in P15 *Fmr1* KO mice. We observe a significant reduction of Pyr cell activity upon laser stimulation in ChRmine-expressing mice but not in control m-Cherry mice ( $0.28 \pm 0.02$  pre vs.  $0.25 \pm 0.02$  with laser;  $p=0.250$  in control mice;  $4.12 \pm 0.83$  pre vs.  $2.18 \pm 0.87$  with laser for ChRmine-expressing mice;  $p=0.031$ , Wilcoxon matched-pairs signed rank test).
- G. Experimental design for calcium imaging recordings in Pyr cells after acute chemogenetic activation of PV-INs at P15 with the hM3Dq DREADD agonist C21 (same as Suppl. Fig. S12A-B).
- H. The percentage of whisker-responsive Pyr cells at P15 was significantly higher in upon C21 injection in *Fmr1* KO-hM3Dq mice ( $n=10$ ) but not in *Fmr1* KO mCherry controls ( $n=6$ ). (hM3Dq group before/after C21:  $23.5 \pm 2.8\%$  vs.  $33.9 \pm 3.9\%$ ;  $p=0.021$ ; and mCherry group before/after C21:  $15.9 \pm 2.3\%$  vs.  $14.5 \pm 2.1\%$ ;  $p=0.983$ ; two-way ANOVA with post-hoc Tukey).
- I. Neuronal adaptation was not affected by the DREADD manipulation (mCherry group before/after C21:  $-0.02 \pm 0.09$  vs.  $-0.05 \pm 0.03$ , hM3Dq group:  $0.02 \pm 0.05$  vs.  $0.03 \pm 0.05$ ,  $p>0.99$ ; two-way ANOVA with post-hoc Tukey).

**Intrinsic properties of PV-Cre<sup>+</sup>;tdTom<sup>+</sup> IN in P15 *Fmr1* KO mice**

**Firing rate and intrinsic properties of Pyramidal cells in P15 *Fmr1* KO mice**

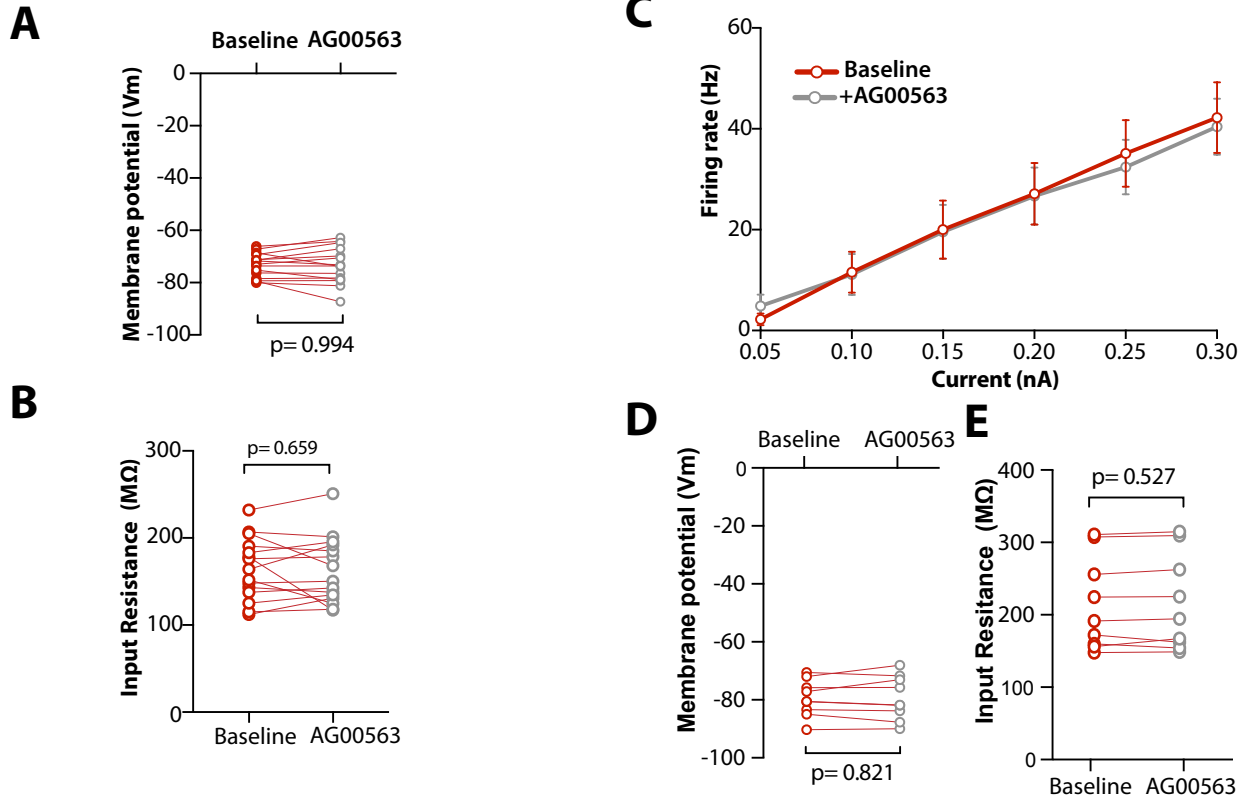

**Acute AG00563 systemic injection modulates whisker-evoked responses**

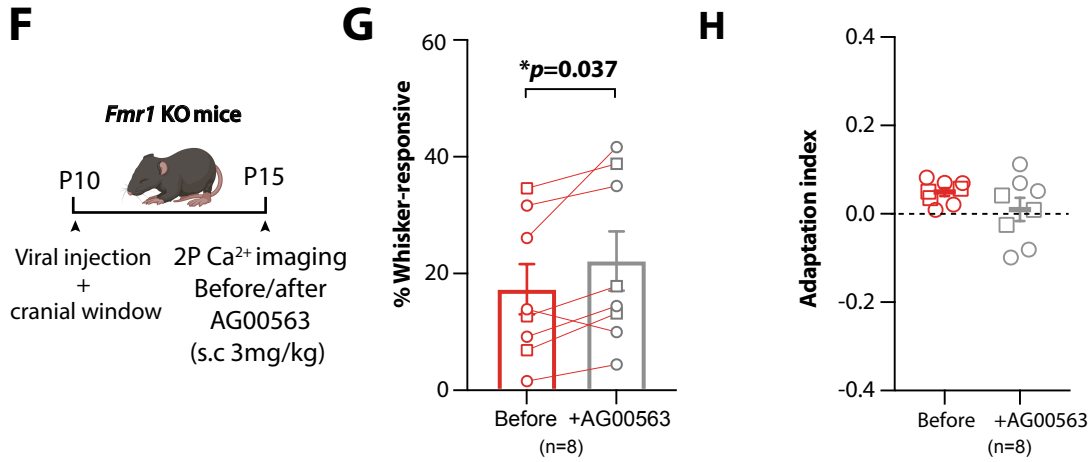

**Proportion of mice grabbing or grooming during whisker stimulation at P21**

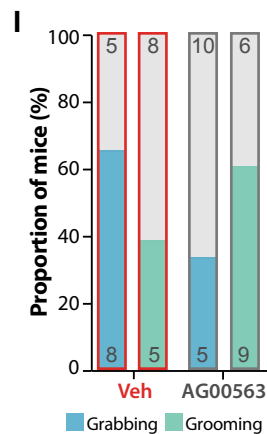

**Supplementary Fig. S13: Intrinsic properties of PV-INs and Pyr cells are unchanged by AG00563 (and relative proportions of grabbing/grooming in AG00563 treated mice).**

(Related to Fig. 8)

- A. Resting membrane potential ( $V_m$ ) of PV-INs is unchanged by bath application of AG00563 during current clamp recordings of *PV*-tdTom+ cells ( $-73.4 \pm 1.2$  mV vs.  $-73.2 \pm 1.8$  mV,  $p = 0.805$ , paired  $t$ -test,  $n = 15$  cells from 6 *Fmr1* KO mice at P15-16).
- B. Input resistance ( $R_m$ ) of PV-INs is unchanged by AG00563 ( $164.6 \pm 9.2$  M $\Omega$  vs.  $161.2 \pm 10.1$  M $\Omega$ ,  $p = 0.608$ , paired  $t$ -test).
- C. Cumulative input-output curves during baseline (red) or bath application of AG00563 (gray) ( $n = 9$  Pyr cells from 6 *PV-Cre;tdTom+/-;Fmr1* KO mice, two-way RM ANOVA).
- D.  $V_m$  of Pyr cells is unchanged by AG00563 ( $-79.5 \pm 2.1$  mV vs  $-79.3 \pm 2.5$  mV,  $p = 0.805$ , paired  $t$ -test).
- E.  $R_m$  of Pyr cells is unchanged by AG00563 ( $214.0 \pm 21.4$  M $\Omega$  vs.  $215.4 \pm 22.0$  M $\Omega$ ,  $p = 0.608$ , paired  $t$ -test).
- F. Experimental design for the acute administration of AG00563 (3 mg/kg, s.c.) and calcium imaging at P15, before and 30 min after injection.
- G. The percentage of whisker-responsive Pyr cells in *Fmr1* KO mice was significantly higher after AG00563 injection compared to baseline ( $17.1 \pm 4.3\%$  baseline vs.  $21.9 \pm 5.1\%$  ~30-40 min after AG00563,  $p = 0.033$ ; paired  $t$ -test,  $n = 8$  mice).
- H. The neuronal adaptation index of Pyr cells was not changed by AG00563 ( $0.05 \pm 0.01$  baseline vs.  $0.01 \pm 0.03$  after AG00563,  $p = 0.033$ ; paired  $t$ -test,  $n = 8$  mice).
- I. A smaller percentage of mice showed defensive behavior (grabbing) at least once during whisker stimulation in the AG00563-treated group than among vehicle controls (5/15 mice vs. 8/13, respectively). The opposite was true for adaptive healthy behavior (grooming) (9/15 mice vs. 5/13, respectively).

| Case ID    | Sex | Age | PMI (Hours) | Diagnosis   | CGG Repeat Count | Hemisphere | Cause of Death                |
|------------|-----|-----|-------------|-------------|------------------|------------|-------------------------------|
| UCD 14-15  | M   | 60  | 80          | Control     | NA               | Right      | Pulmonary Emboli              |
| UCD 18-05  | M   | 62  | 37          | Control     | NA               | Left       | Cardiopulmonary Arrest        |
| UCD 15-07  | F   | 64  | NK          | Control     | NA               | Left       | NK                            |
| UCD 18-07  | M   | 65  | 240         | Control     | NA               | Left       | Cardiac Arrest                |
| UCD 14-01  | M   | 66  | 48.5        | Control     | NA               | Right      | Acute Renal Failure           |
| UCD 18-08  | M   | 68  | 168         | Control     | NA               | Left       | Hypoxic Respiratory Failure   |
| UCD 14-12  | M   | 68  | NK          | Control     | NA               | Left       | Cardiac Arrest                |
| UCD 19-12  | M   | 81  | 72          | Control     | NA               | Left       | NK                            |
| 1031-08-GP | M   | 57  | 20          | FXS         | 436              | Left       | Multiple System Organ Failure |
| 1031-09-LZ | M   | 64  | 11.5        | FXS         | 429              | Left       | NK                            |
| 1061-19-JB | F   | 64  | 30          | FXS         | 629,780          | Left       | NK                            |
| 1005-14-JC | M   | 65  | 60          | FXS         | 600-700          | Right      | Congestive Heart Failure      |
| 1013-10-SK | M   | 76  | NK          | FXS & FXTAS | 447,540          | Left       | Respiratory Failure           |
| 1001-18-LD | M   | 78  | 6           | FXS         | 235              | Right      | NK                            |
| 1033-08-WS | M   | 79  | 17.5        | FXS         |                  | Left       | NK                            |
| 1007-18-RF | M   | 80  | NK          | FXS         | 1,000            | Right      | NK                            |

**Table S1. Clinical characteristics of postmortem neurotypical and Fragile X cases.**

**(Related to Figure 3).**

(NK: not known; NA: not applicable; M: male; F: female; PMI: post-mortem interval; FXS: Fragile X syndrome; FXTAS: Fragile X-associated tremor/ataxia syndrome).

## SUPPLEMENTAL VIDEOS

**Supplementary video 1** (Related to Fig. 2). Example of in vivo calcium imaging of Pyr cells before, during, and after optogenetic stimulation of presumed future PV-IN s in Nkx2.1-Cre;SST-Flp<sup>+/−</sup> mice at P10. Data was acquired at 15 fps and is played back at 2x speed.

**Supplementary video 2** (Related to Fig. 4). Example of in vivo calcium imaging of Pyr cells during whisker-evoked activity in Nkx2.1-Cre mice at P2. Data was acquired at 15 fps and is played back at 1x speed.

## References

1. Che, A., Babij, R., Iannone, A.F., Fetcho, R.N., Ferrer, M., Liston, C., and García, N.V.D.M. (2018). Layer I Interneurons Sharpen Sensory Maps during Neonatal Development. *Neuron* 99, 98-116.e7. 10.1016/j.neuron.2018.06.002.
2. Nigro, M.J., Hashikawa-Yamasaki, Y., and Rudy, B. (2018). Diversity and Connectivity of Layer 5 Somatostatin-Expressing Interneurons in the Mouse Barrel Cortex. *Journal of Neuroscience* 38, 1622–1633. 10.1523/jneurosci.2415-17.2017.
3. Daigle, T.L., Madisen, L., Hage, T.A., Valley, M.T., Knoblich, U., Larsen, R.S., Takeno, M.M., Huang, L., Gu, H., Larsen, R., et al. (2018). A Suite of Transgenic Driver and Reporter Mouse Lines with Enhanced Brain-Cell-Type Targeting and Functionality. *Elsevier Inc.* 174, 465-480.e22. 10.1016/j.cell.2018.06.035.
